# Supplementary material for: Novel benzimidazole salts for lithium ion battery electrolytes: effects of substituents
Source: Royal Society of Chemistry journal article supplement (doi:10.1039/c5cp00982k), 2015-01-01
Supplement: c5cp00982k1.pdf [file c5cp00982k1.pdf]

## Supporting Information

### Novel Benzimidazole Salts for Lithium Ion Battery

#### Electrolytes: Effects of Substituents

*Tun Sriana, Ermias Girma Leggesse\*, and Jyh-Chiang Jiang\**

Department of Chemical Engineering, National Taiwan University of Science and Technology, No. 43  
Keelung Road, Section 4, Taipei 106, Taiwan, R.O.C.

#### **Correspondent Authors:**

\*Jyh-Chiang Jiang

Department of Chemical Engineering, National Taiwan University of Science and Technology,  
No. 43, Keelung Road, Section 4, Taipei 106, Taiwan, R.O.C.

Email: [jcjiang@mail.ntust.edu.tw](mailto:jcjiang@mail.ntust.edu.tw); Fax: 886 2 2737 6644; Tel: 886 2 2737 6653

\*Ermias Girma Leggesse

Department of Chemical Engineering, National Taiwan University of Science and Technology,  
No. 43, Keelung Road, Section 4, Taipei 106, Taiwan, R.O.C.

Email: [ermigirma@mail.ntust.edu.tw](mailto:ermigirma@mail.ntust.edu.tw); Fax: 886 2 2737 6644; Tel: 886 2 2737 6653

Figure S1. Optimized structures of the anions calculated with SMD-B3LYP/6-311++G(d,p).

Values are given in Å.

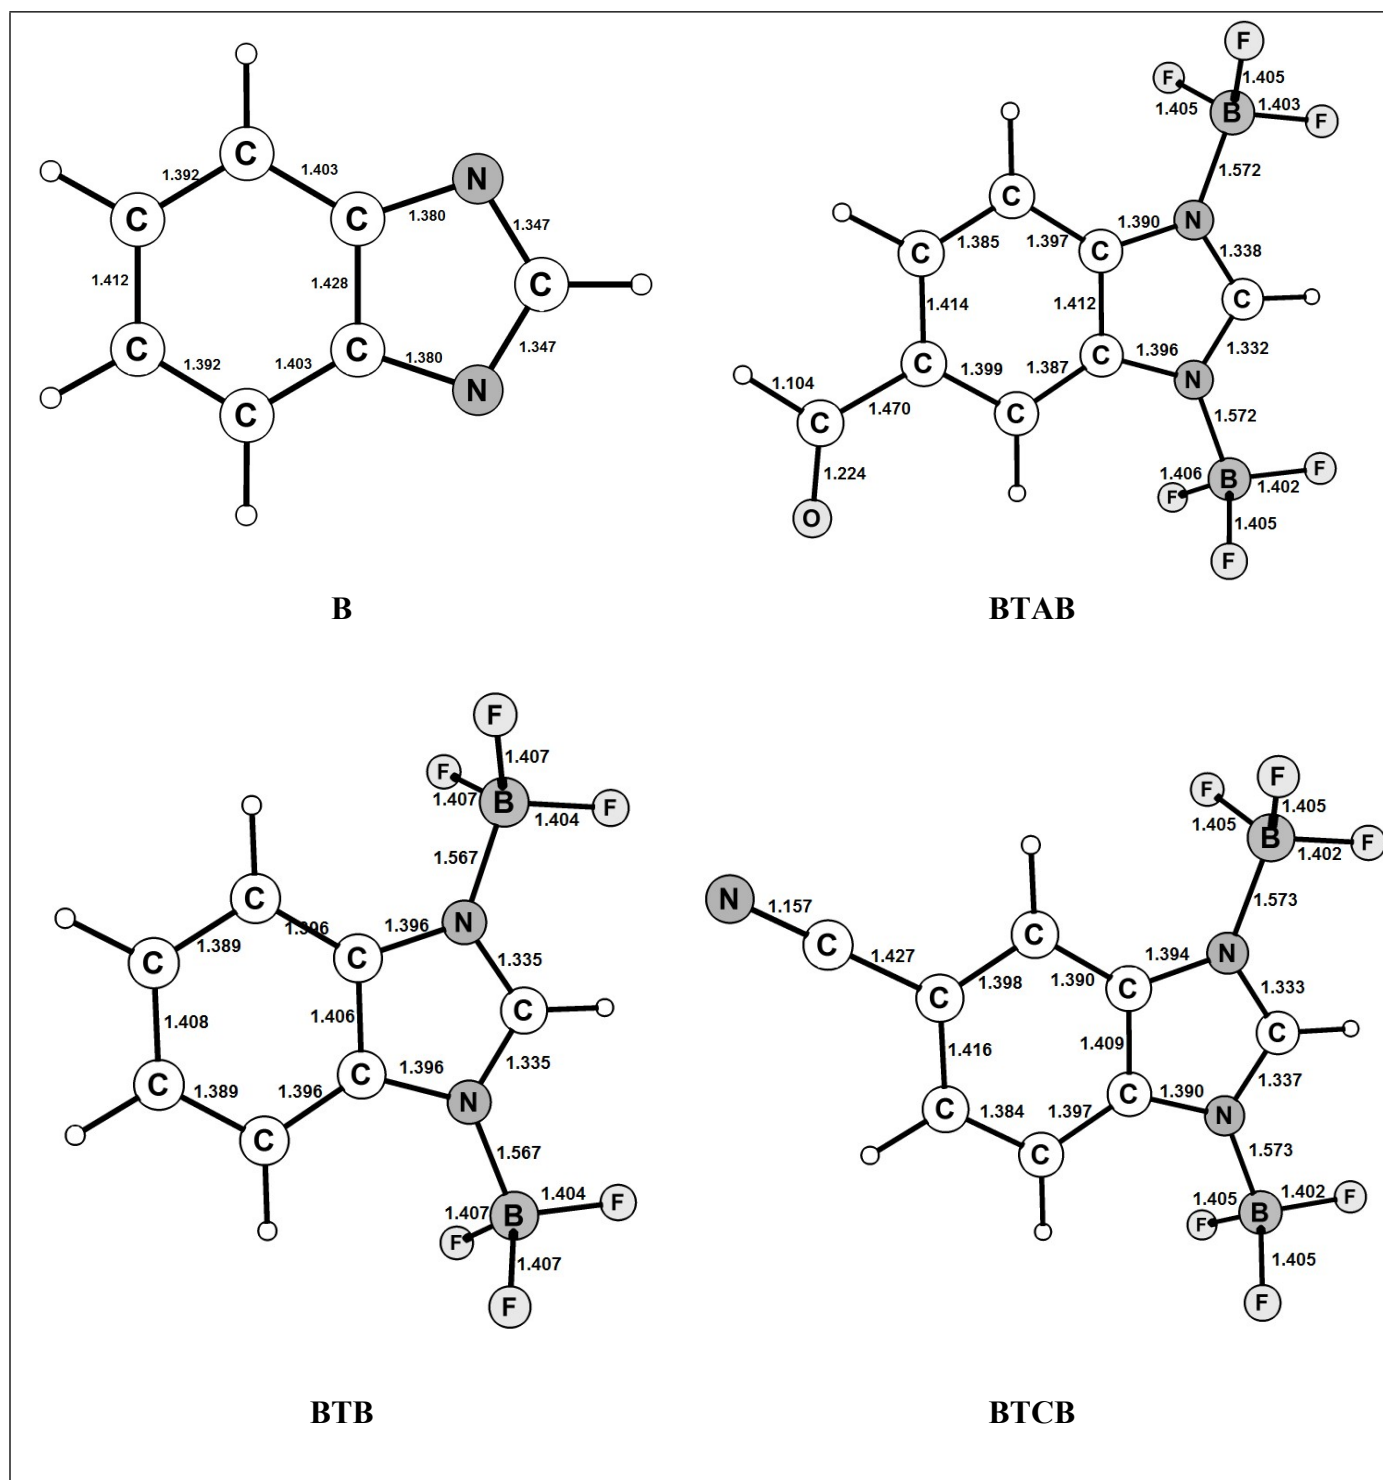

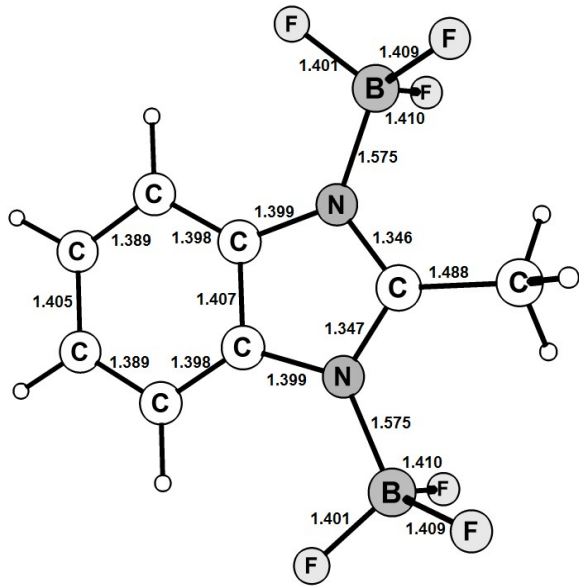

**BTMB**

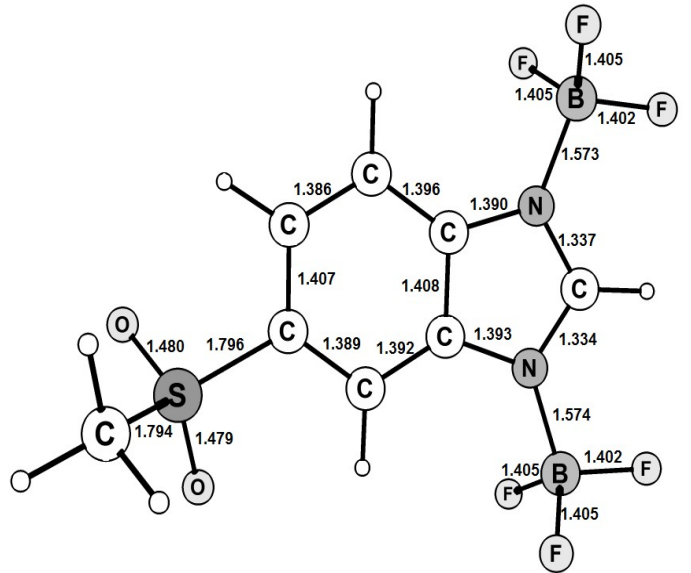

**BTSB**

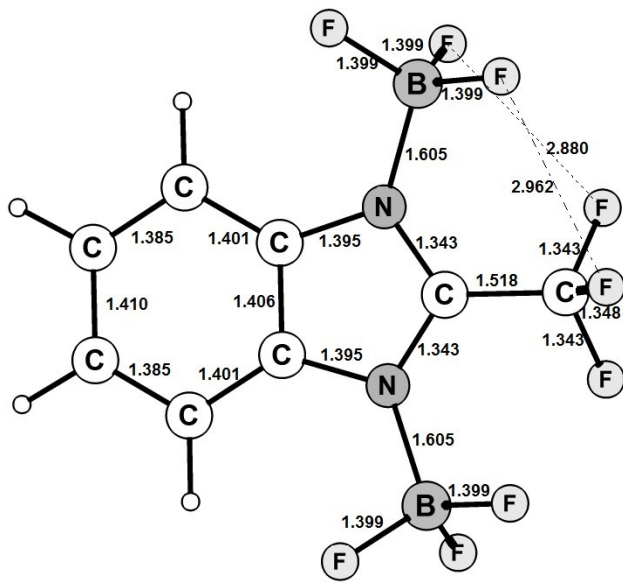

**BTTB**

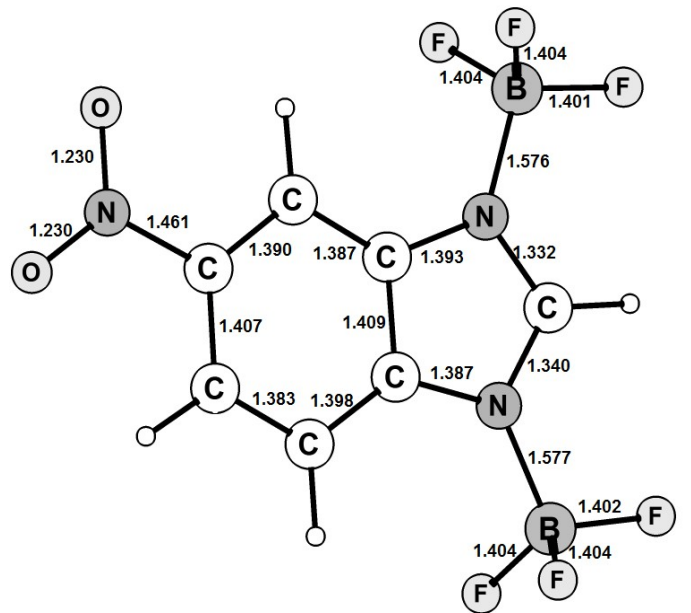

**BTNB**

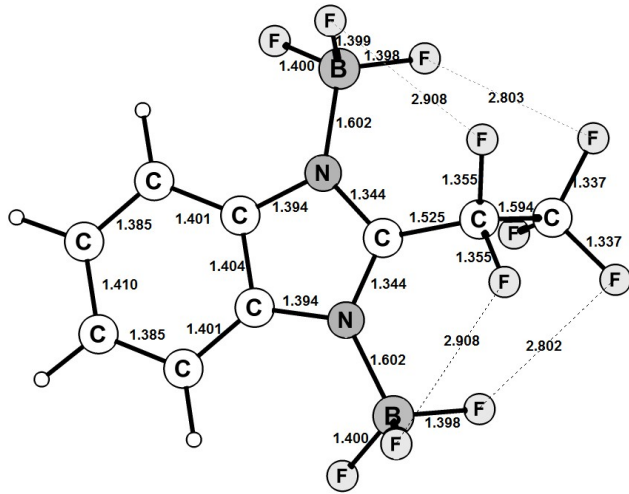

**BTPB**

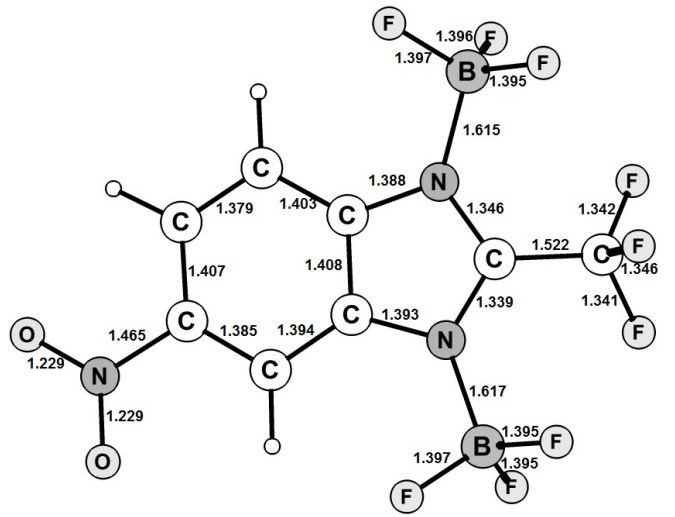

**BTNTB**

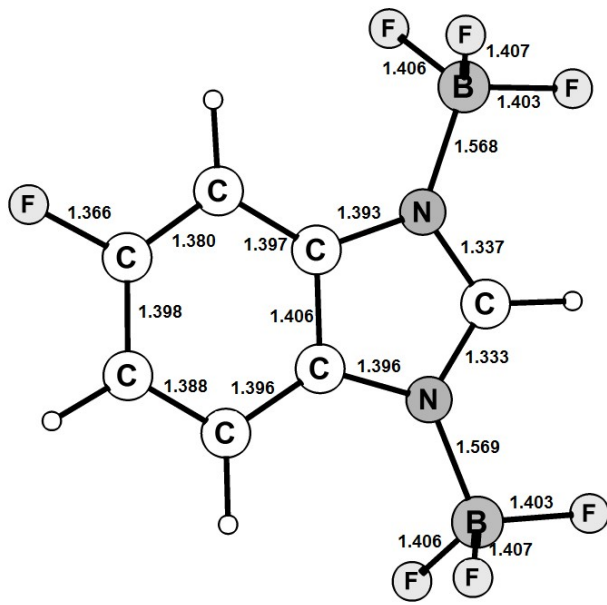

**BTFB**

Figure S2. Optimized structures of the ion pairs calculated with SMD-B3LYP/6-311++G(d,p).

Values are given in Å.

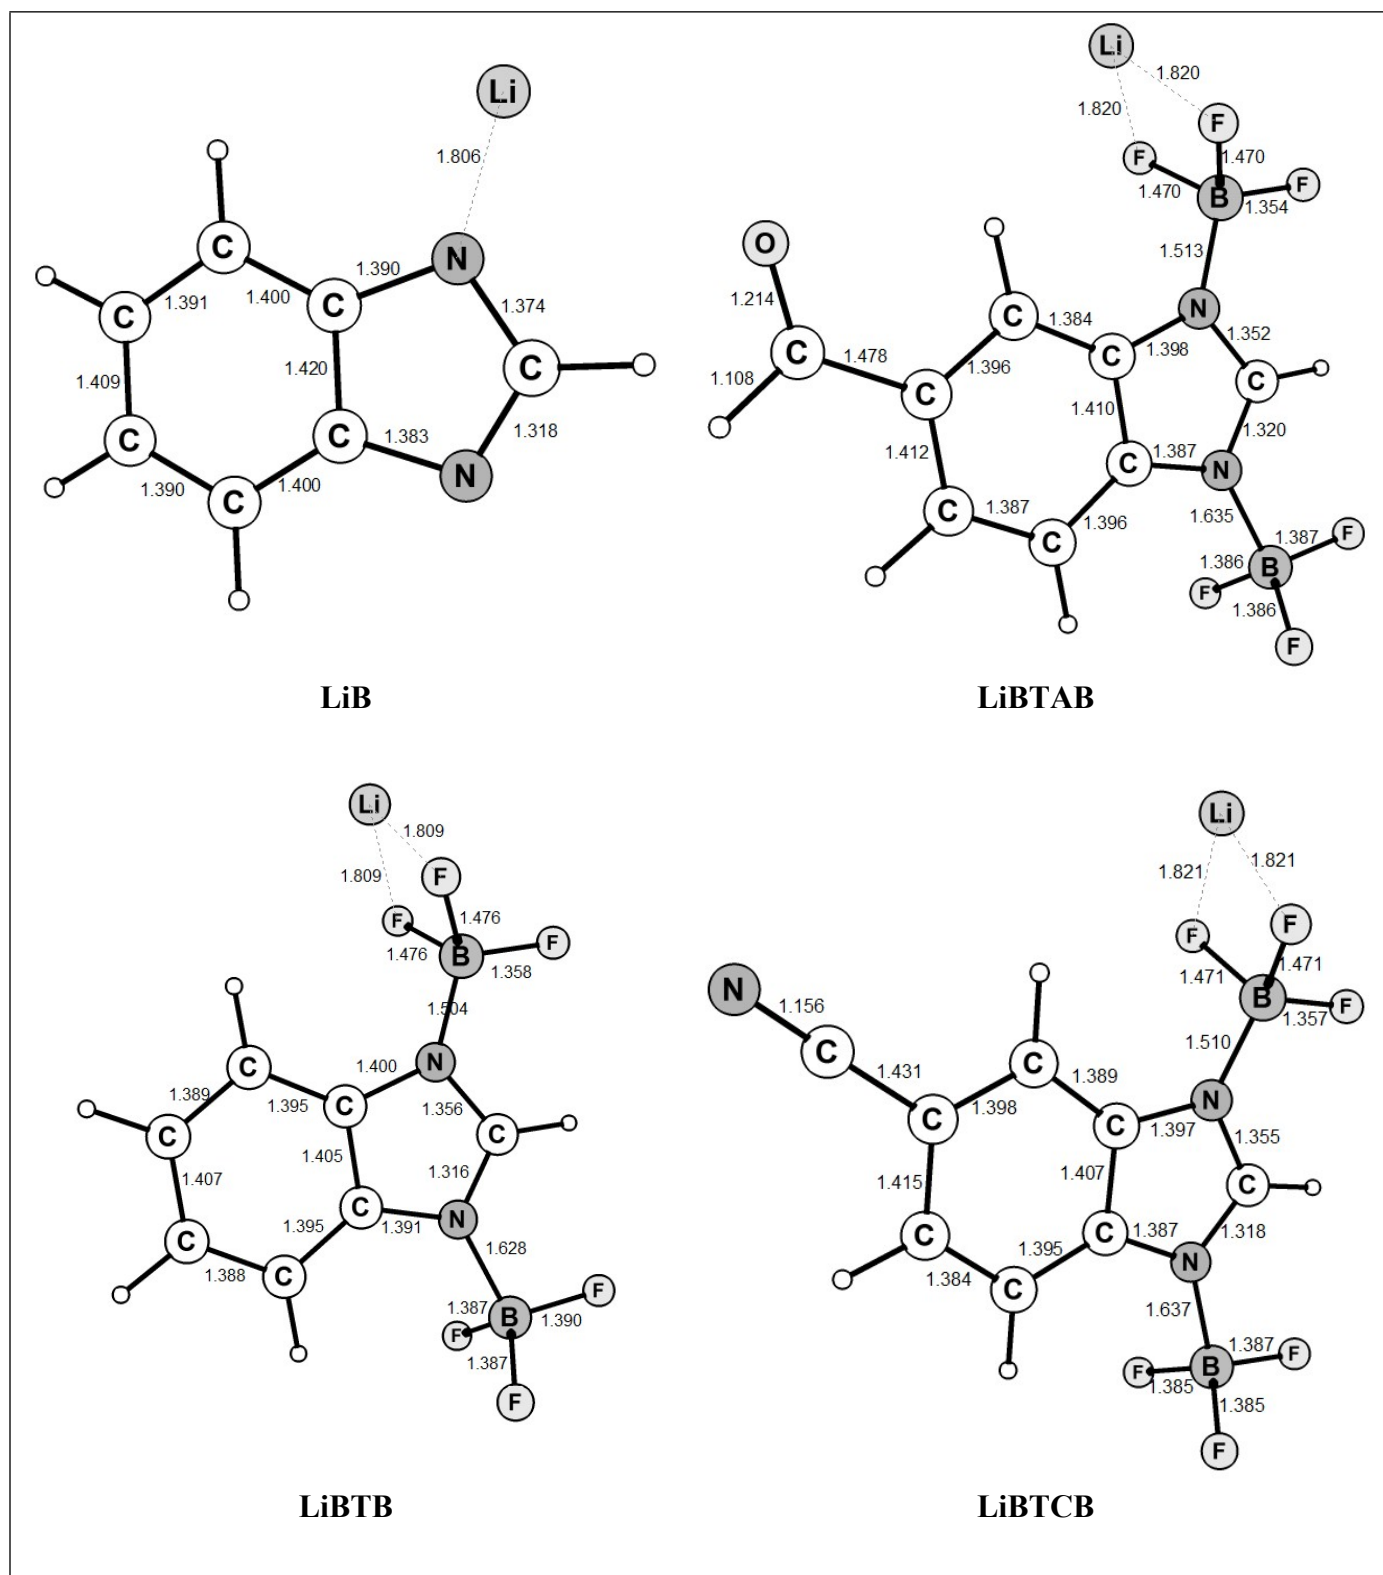

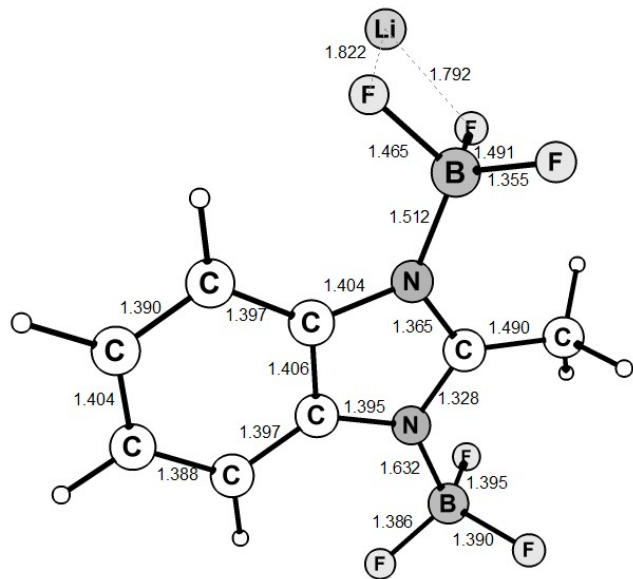

**LiBTMB**

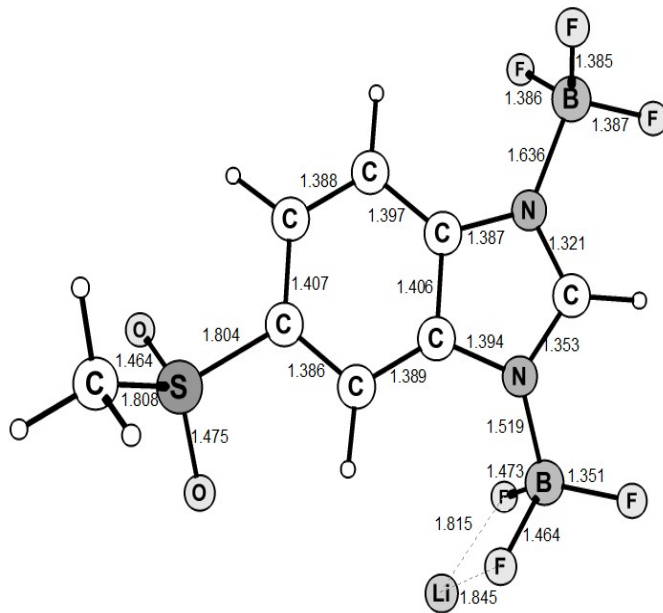

**LiBTSB**

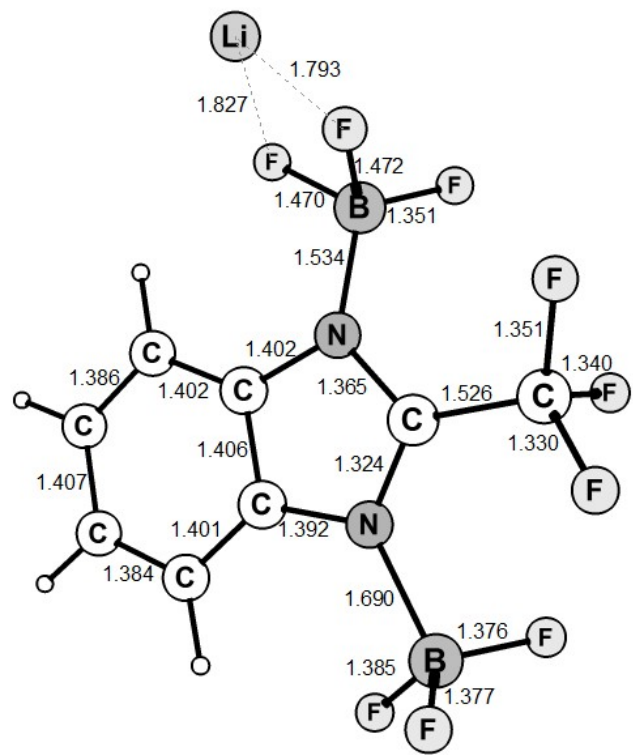

**LiBTTB**

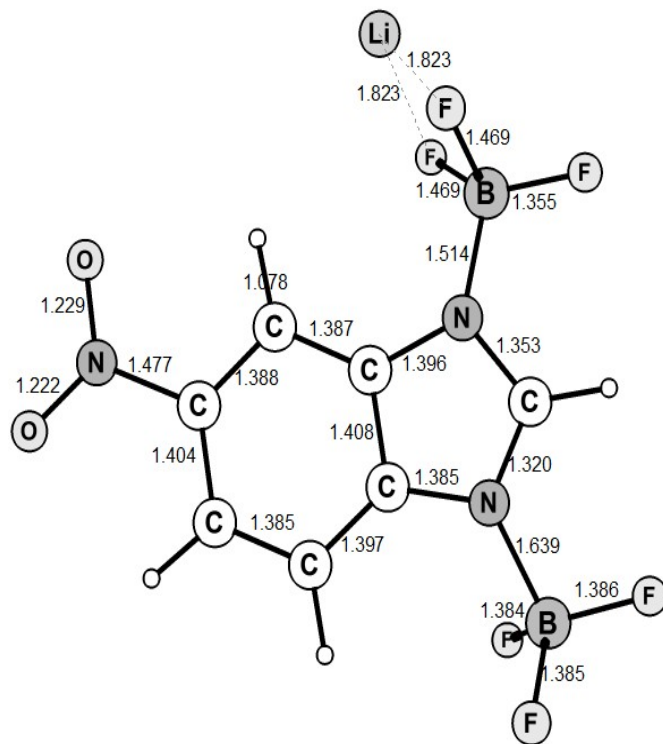

**LiBTNB**

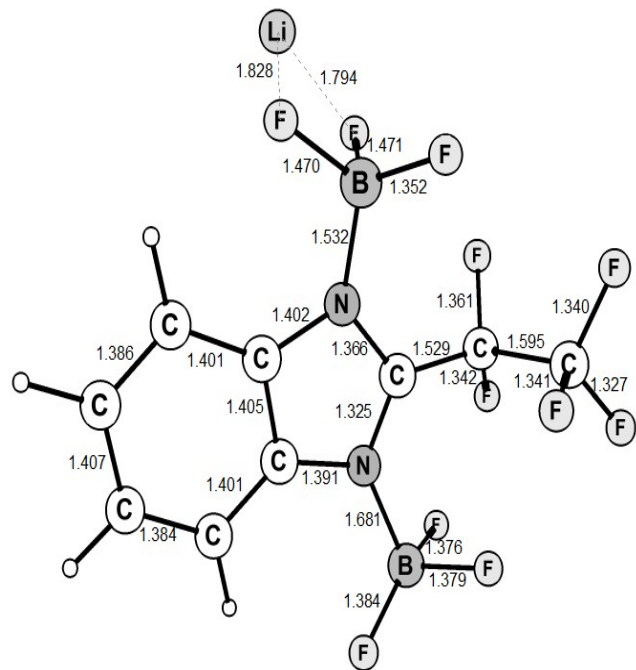

**LiBTPB**

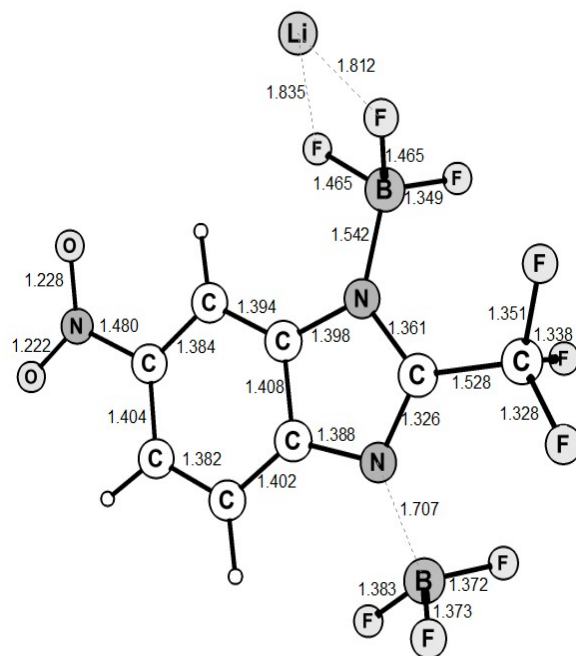

**LiBTNTB**

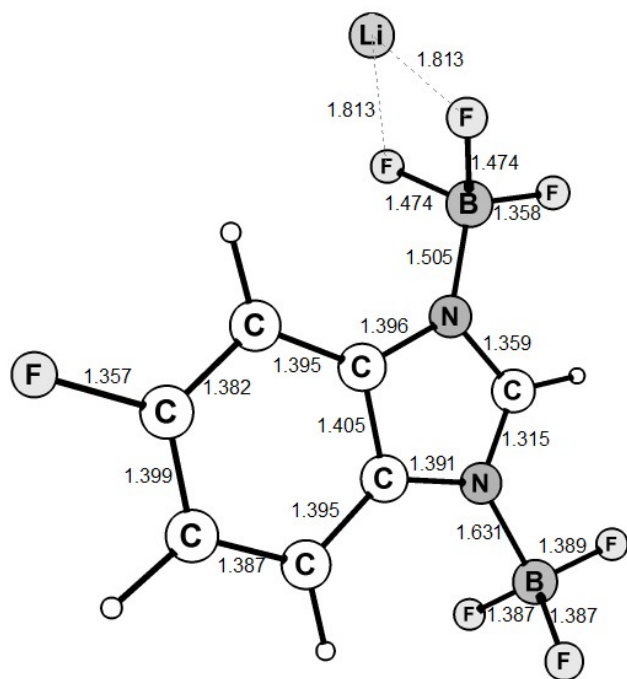

**LiBTFB**

Table S1. Lithium ion pair dissociation energies,  $\Delta E_d$  (kcal /mol) in vacuum, implicit solvation and with BSSEs correction calculated at the level of B3LYP/6-311++G(d, p).

| Structure         | In vacuum | In implicit solvent | BSSE corrected |
|-------------------|-----------|---------------------|----------------|
| LiB               | 137.72    | 23.23               | 137.31         |
| LiBTB             | 115.28    | 14.57               | 114.48         |
| LiBTMB            | 116.29    | 14.98               | 115.48         |
| LiBTTB            | 112.92    | 14.20               | 112.09         |
| LiBTPB            | 112.50    | 14.02               | 111.67         |
| LiBTFB            | 113.42    | 14.33               | 112.61         |
| LiBTAB            | 114.14    | 14.38               | 113.34         |
| LiBTCB            | 109.78    | 13.81               | 108.99         |
| LiBTSB            | 112.67    | 14.03               | 111.85         |
| LiBTNB            | 110.13    | 13.85               | 109.32         |
| LiBTNTB           | 107.86    | 13.32               | 107.02         |
| LiPF <sub>6</sub> | 133.95    | 15.12               | 132.64         |
